# Supplementary material for: Biolistic delivery of liposomes protected in metal-organic frameworks
Source: PubMed Central journal article supplement — Proc Natl Acad Sci U S A. 2023 Mar 6;120(11):e2218247120. doi: 10.1073/pnas.2218247120 (PMC10089211; doi:10.1073/pnas.2218247120), 2023-03-06
Supplement: pnas.2218247120.sapp.pdf [file pnas.2218247120.sapp.pdf]

## Supporting Information for

### **Biolistic Delivery of MOF-Protected Liposomes**

Sneha Kumari<sup>a</sup>, Yalini H. Wijesundara<sup>a</sup>, Thomas S. Howlett<sup>a</sup>, Mohammad Waliullah<sup>b</sup>, Fabian C. Herbert<sup>a</sup>, Arun Raja<sup>a</sup>, Ikeda Trashi<sup>a</sup>, Rodrigo A. Bernal<sup>b</sup>, Jeremiah J. Gassensmith<sup>a,c\*</sup>

Jeremiah J. Gassensmith  
Email: gassensmith@utdallas.edu

#### **This PDF file includes:**

- Figures S1 to S10
- Table S1
- Movie S1

**Figure S1.**

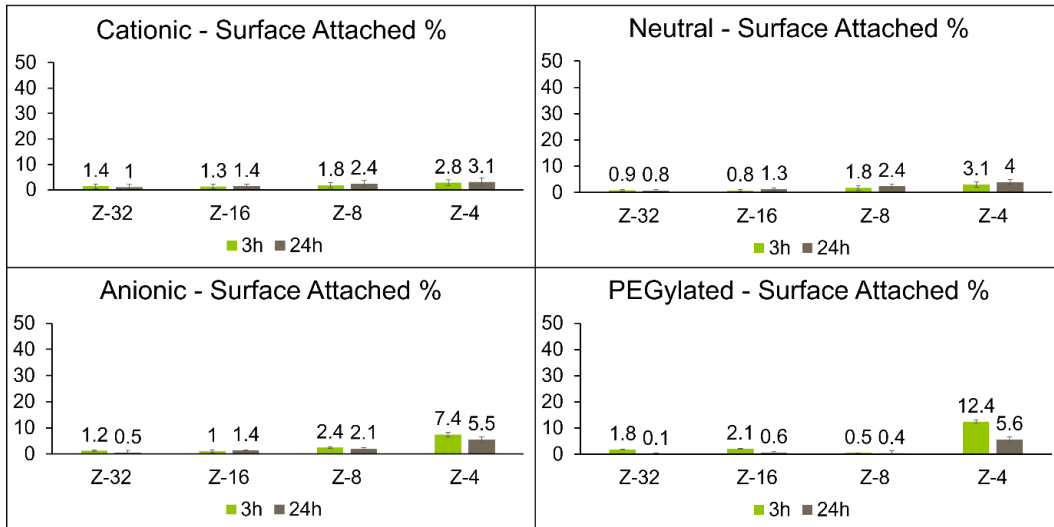

Figure S1: Quantification of liposomes attached to the exterior surface of ZIF-8 electrostatically for various lipid formulations, L/M ratios and encapsulation times. Y-axis denotes percent of total liposomes that were found to be surface attached. X-axis of each graph denote various Lip@Z formulations. Error bars represent  $\pm$  SD.

## **Movie S1.**

(File attached)

Movie S1: Video showing the first five minutes of ZIF-8 and Lip@Z synthesis. Synthesis is carried out as described in the Table 1. The ZIF-8 vial had water and 2-methylimidazole, and the Lip@Z vial had liposomes, water and 2-methylimidazole added prior to recording. Zinc acetate was added via a pipette and reaction was allowed to proceed without disturbance.

**Figure S2.**

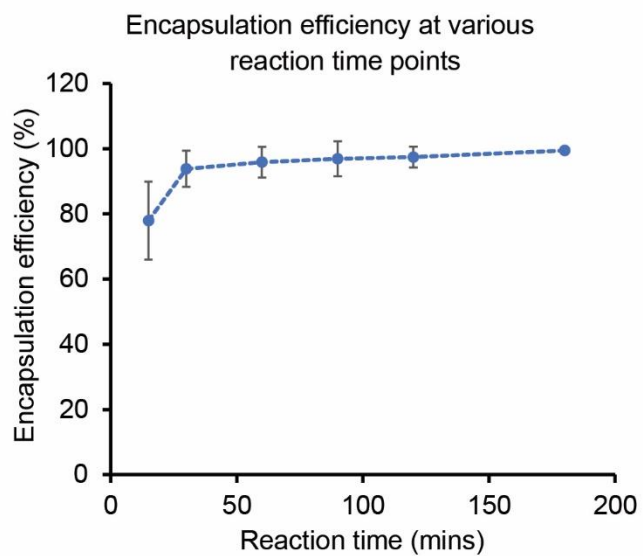

Figure S2: Encapsulation efficiency of Neu@Z-32 after 15 min, 30 min, 1 h, 1.5 h, 2 h and 3 h. Y-axis denotes the encapsulation efficiency in percentage. X-axis denotes reaction time in minutes. Error bars represent  $\pm$  SD.

Figure S3.

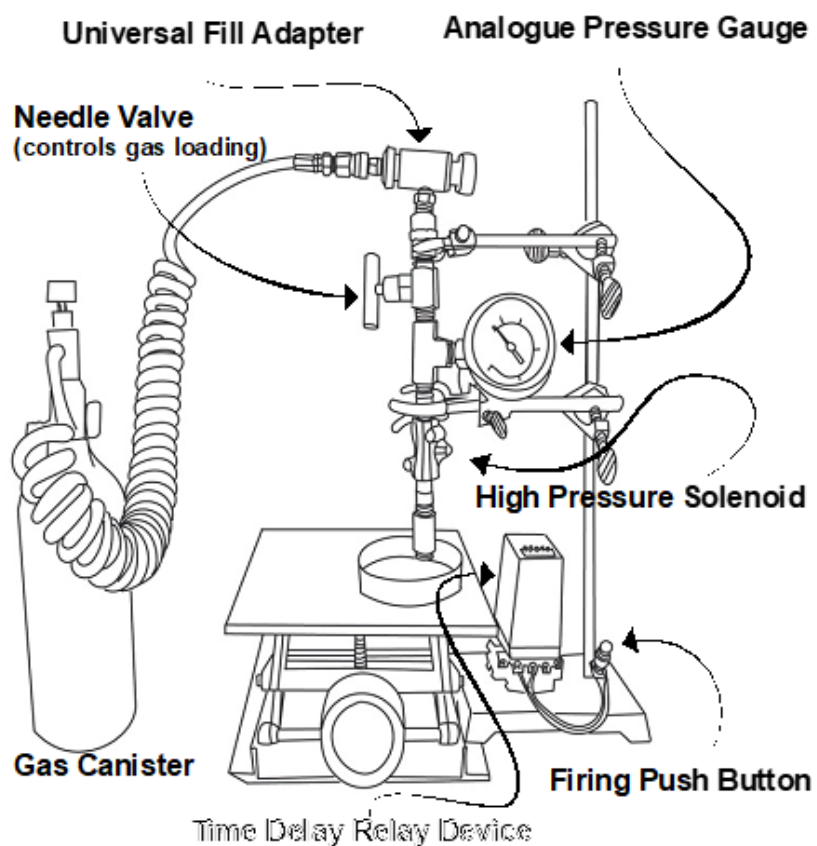

Figure S3: Illustration of the MOF-Jet built in-house.

**Figure S4.**

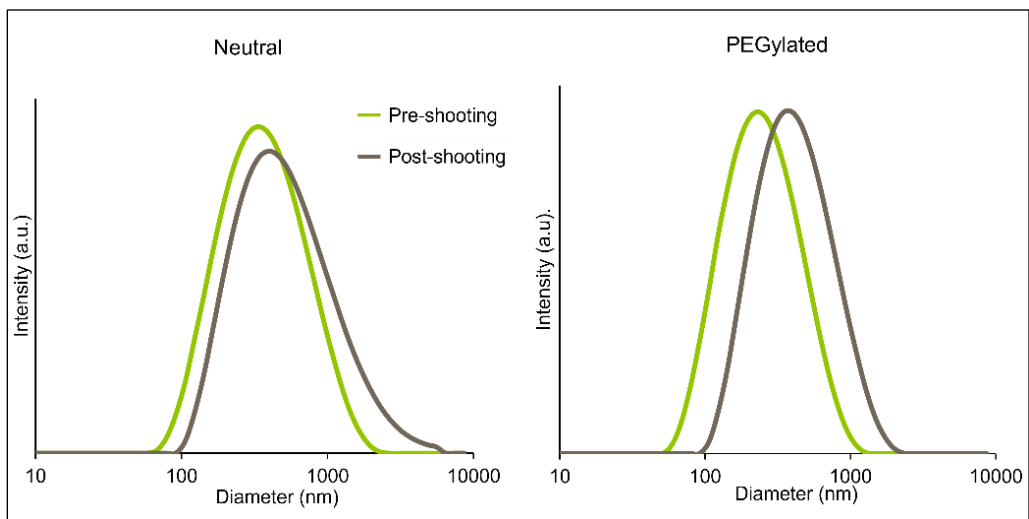

Figure S4: DLS graphs of neutral and PEGylated formulation liposomes before and after being delivered by the MOF-Jet.

Figure S5.

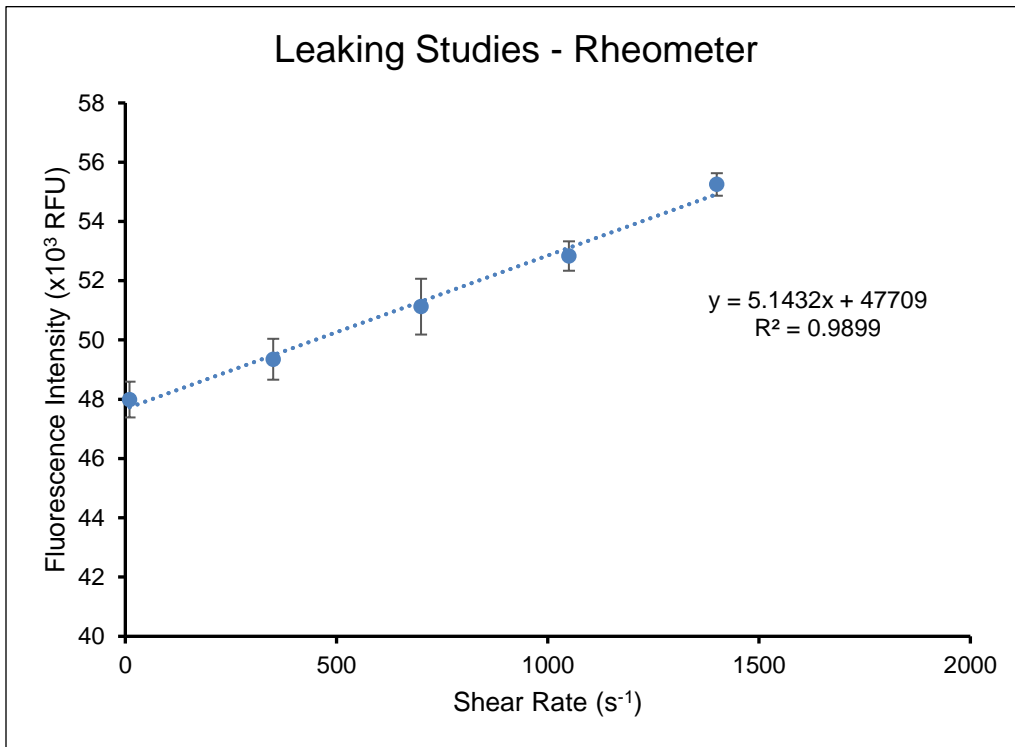

Figure S5: Graph depicting the linear relationship between fluorescence from leaking of CF dye and the shear rate at which the liposomes were stressed using a rheometer. Error bars represent  $\pm$  SD.

**Table S1.**

| <b>MOF-Jet pressure (PSI)</b> | <b>MOF-Jet pressure (kPa)</b> | <b>Shear rate (s<sup>-1</sup>)</b> |
|-------------------------------|-------------------------------|------------------------------------|
| 200                           | 1379                          | 1208.46                            |
| 400                           | 2758                          | 2034.53                            |
| 600                           | 4137                          | 3315.51                            |

Table S1: Shear stress experienced by delivered material at varying pressures of the MOF-Jet. The calculation was carried out by equating leaking of CF-filled liposomes when stressed by rheometer to that of the MOF-Jet.



Fig. S6.

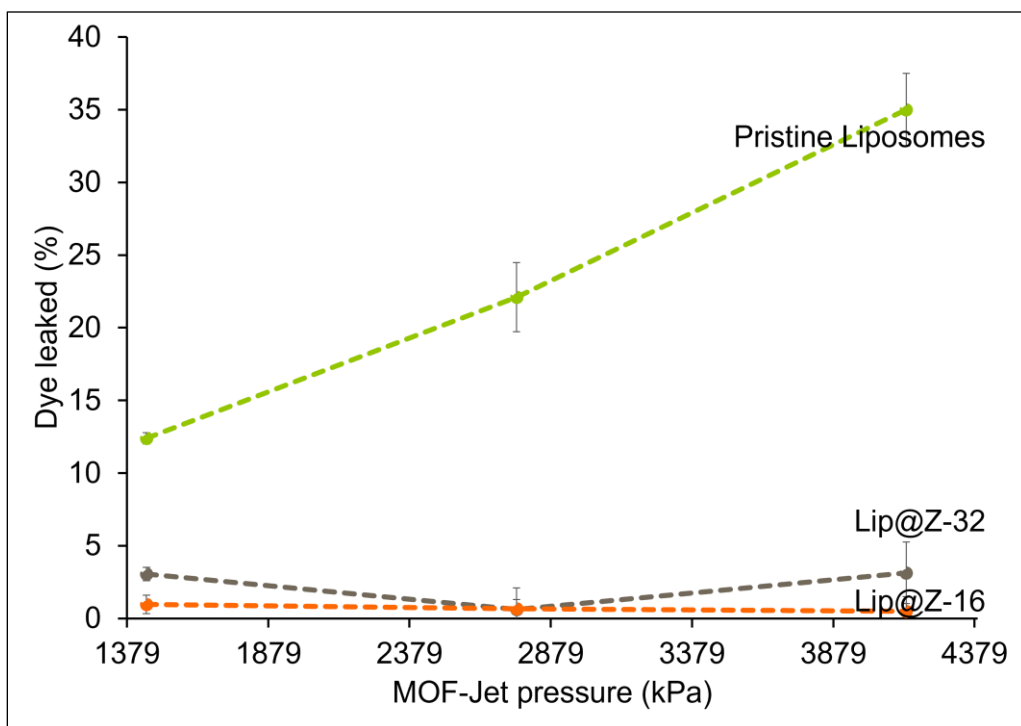

Fig S6: Quantification of dye leaking of pristine unencapsulated CF-filled liposomes, Lip@Z-32 and Lip@Z-16 at varying MOF-Jet pressures. Error bars represent  $\pm$  SD.

Fig. S7.

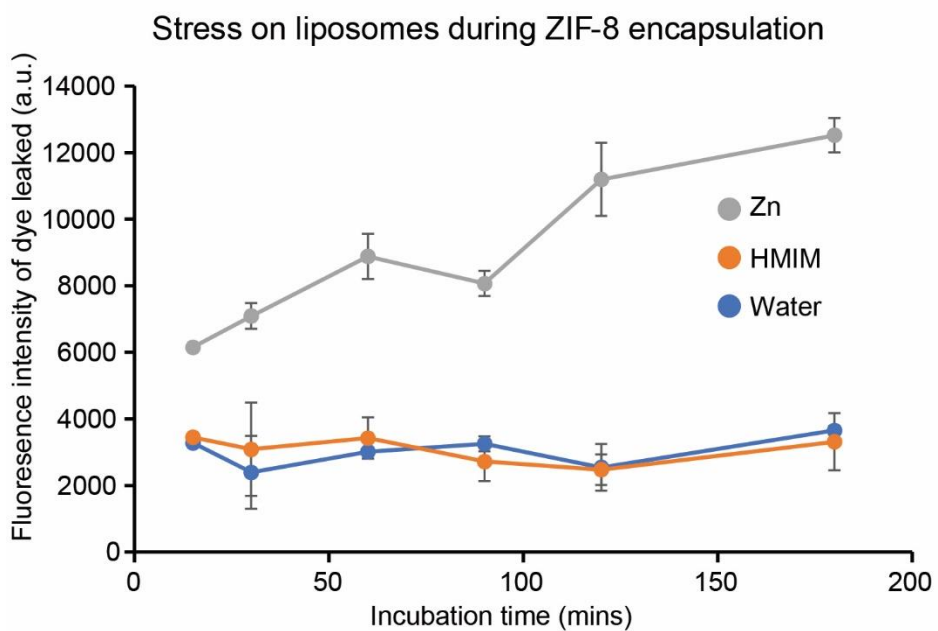

Fig S7: Quantification of fluorescence in the supernatant from CF dye leaked from liposomes upon incubation with Zn, HMIM and water. Y-axis is fluorescence intensity in a.u., X-axis is incubation time in mins. Error bars represent  $\pm$  SD.

**Fig. S8.**

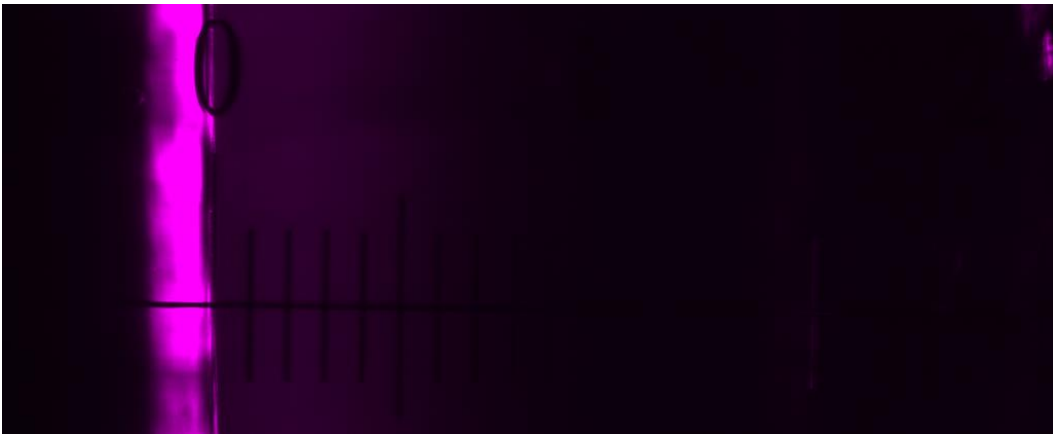

Fig S8: Gel cross-section of Cy5@Lip when delivered into agarose gel.

Fig. S9.

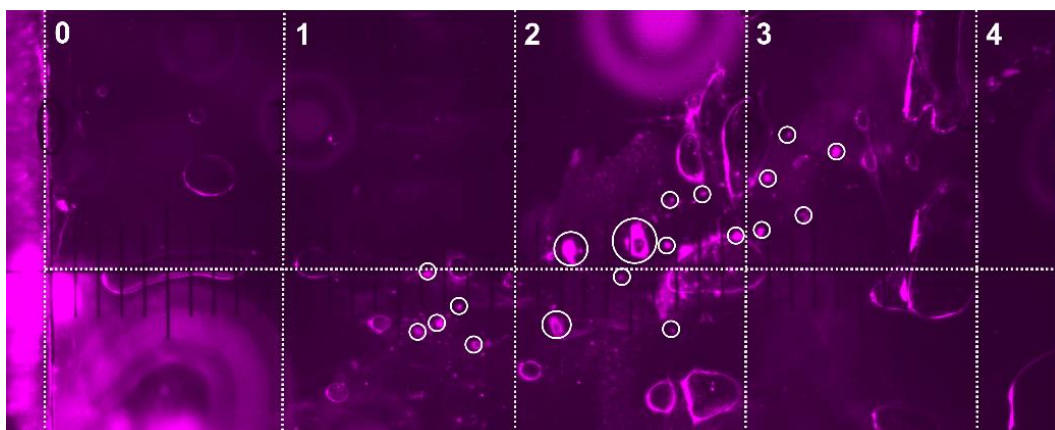

Fig S9: Gel cross-section of Cy5@Lip@Z when delivered into agarose gel.

**Fig. S10.**

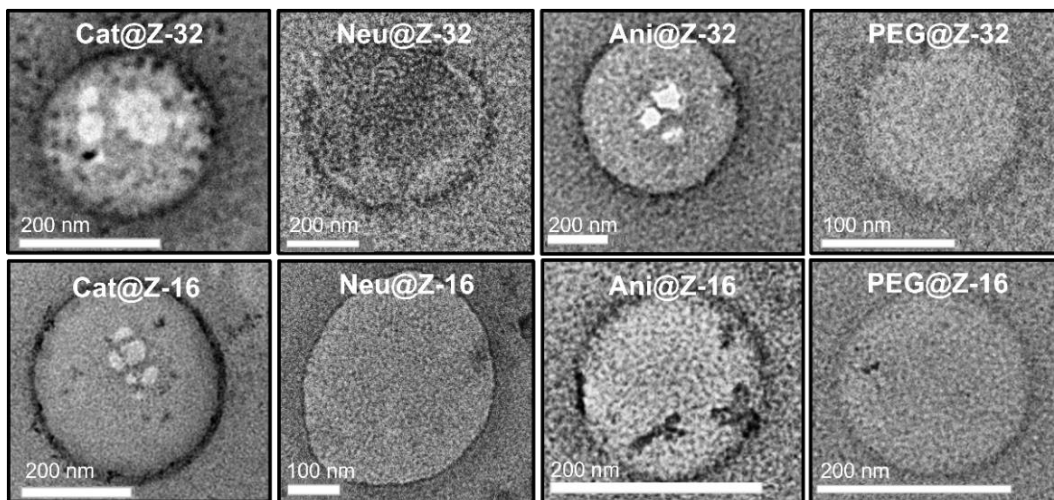

Fig S10: TEM images of various Lip@Z formulations after removal of the ZIF-8 coating via exfoliation using 0.5M EDTA.
